# Supplementary material for: Surfing the Waves: Differences in Hospitalised COVID-19 Patients across 4 Variant Waves in a Belgian University Hospital
Source: MDPI journal article supplement (doi:10.3390/v15030618), 2023-02-23
Supplement: s1 [file s1]

**Table S1.** Additional demographic data.

| Period of Admission                   | Pre-VOC     | Alpha      | Delta       | Omicron    | <i>p</i> -Value |
|---------------------------------------|-------------|------------|-------------|------------|-----------------|
| Number of patients<br>(% within wave) | <b>814</b>  | <b>174</b> | <b>265</b>  | <b>73</b>  | na              |
| <b>Ethnicity</b>                      |             |            |             |            | <0.001          |
| Caucasian                             | 429 (55.9%) | 82 (47.7%) | 129 (49.2%) | 45 (65.2%) |                 |
| Sub-saharan African                   | 65 (8.5%)   | 8 (4.7%)   | 18 (6.9%)   | 3 (4.3%)   |                 |
| North-African                         | 131 (17.1%) | 59 (34.3%) | 58 (32.4%)  | 17 (24.6%) |                 |
| Asian / Oriental                      | 7 (0.9%)    | 3 (1.7%)   | 4 (1.5%)    | 2 (2.9%)   |                 |
| Indian subcontinent                   | 3 (0.4%)    | 5 (2.9%)   | 0 (0.0%)    | 0 (0.0%)   |                 |
| South-American                        | 2 (0.3%)    | 0 (0.0%)   | 1 (0.4%)    | 0 (0.0%)   |                 |
| Multiracial                           | 0 (0.0%)    | 1 (0.6%)   | 0 (0.0%)    | 0 (0.0%)   |                 |
| Do not know                           | 123 (16.0%) | 14 (8.1%)  | 21 (8.0%)   | 1 (1.4%)   |                 |
| Other                                 | 7 (0.9%)    | 0 (0.0%)   | 4 (1.5%)    | 1 (1.4%)   |                 |
| <b>BMI</b>                            | 28.2 ±5.7   | 28.9 ±5.5  | 28.5 ±6.1   | 27.7 ±6.2  | 0.084           |
| Normal weight (< 24,9)                | 245 (32.0%) | 40 (23.1%) | 81 (31.0%)  | 26 (37.1%) | 0.177           |
| Overweight (25 – 29,9)                | 273 (35.6%) | 70 (40.5%) | 87 (33.3%)  | 24 (34.3%) |                 |
| Obesity class I (30-34,9)             | 147 (19.2%) | 40 (23.1%) | 67 (25.7%)  | 12 (17.1%) |                 |
| Obesity class II (>35)                | 101 (13.2%) | 23 (13.3%) | 26 (10.0%)  | 8 (11.4%)  |                 |
